# Supplementary material for: A core–shell polypyrrole@silicon carbide nanowire (PPy@SiC) nanocomposite for the broadband elimination of electromagnetic pollution
Source: Royal Society of Chemistry journal article supplement (doi:10.1039/c6ra06663a), 2016-01-01
Supplement: c6ra06663a1.pdf [file c6ra06663a1.pdf]

# **Electronic Supplementary Information (ESI)**

## **Core-shell polypyrrole@silicon carbide nanowire (PPy@SiC) nanocomposite for the broadband elimination of electromagnetic pollution**

Kun Zhang,<sup>a,b</sup> Mengxiao Sun,<sup>c</sup> Wanchun Jiang,<sup>b</sup> Yuan Wang,<sup>b</sup> Derong Wang,<sup>b</sup> Fan Wu,<sup>b\*</sup> Aming Xie<sup>b,d</sup> and Wei Dong<sup>a\*</sup>

<sup>a</sup>*School of Chemical Engineering, Nanjing University of Science & Technology, Nanjing 210094, P. R. China.*

<sup>b</sup>*State Key Laboratory for Disaster Prevention & Mitigation of Explosion & Impact, PLA University of Science and Technology, Nanjing 210007, P. R. China.*

<sup>c</sup>*Key Laboratory of Science and Technology on Electromagnetic Environmental Effects and Electro-optical Engineering, PLA University of Science and Technology, Nanjing 210007, P. R. China.*

<sup>d</sup>*School of Mechanical Engineering, Nanjing University of Science & Technology, Nanjing 210094, P. R. China.*

**Table S1** Typical SiC and PPy based absorbers

| Filler                              | Matrix | Loading ratio<br>(wt%) | Thickness<br>(mm) | Effective bandwidth<br>(GHz) (RL below – 10 dB) | Ref.      |
|-------------------------------------|--------|------------------------|-------------------|-------------------------------------------------|-----------|
| PPy@SiC                             | Wax    | 10                     | 2.5               | 6.52                                            | This work |
| SiC-Fe <sub>3</sub> O <sub>4</sub>  | Wax    | 50                     | unknown           | 4.20                                            | 1         |
| SiC/Co                              | Wax    | 50                     | unknown           | 5.10                                            | 2         |
| N doped SiC                         | Wax    | unknown                | 2.5               | ≤ 3.00                                          | 3         |
| Si <sub>3</sub> N <sub>4</sub> -SiC | Wax    | unknown                | 3.5               | 4.10                                            | 4         |
| PPy aerogel                         | Wax    | 7                      | 2.5               | 6.20                                            | 5         |
| PPy/RGO                             | Wax    | 10                     | 3.0               | 6.76                                            | 6         |
| Z-BCF/SiO <sub>2</sub> /PPy         | Wax    | 33.3                   | 2.0               | 5.06                                            | 7         |
| PPy particles                       | Wax    | 15                     | 2.0               | 5.48                                            | 8         |

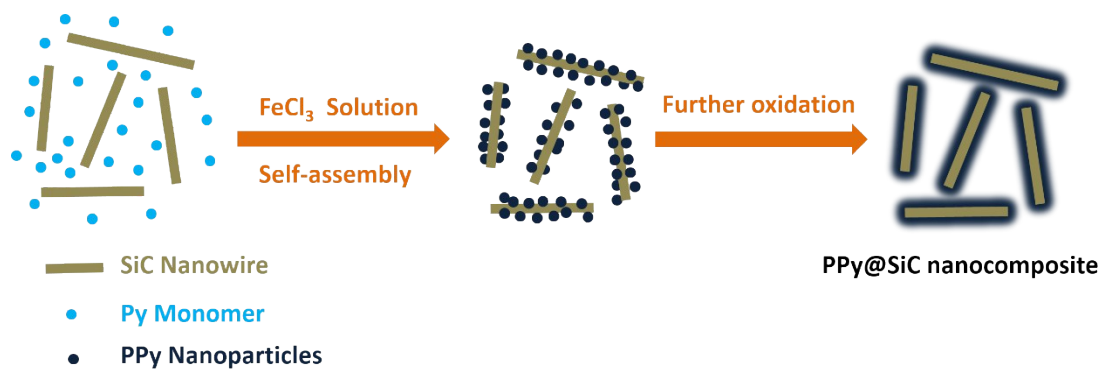

**Scheme S1** The synthetic strategy for core-shell PPy@SiC nanocomposite.

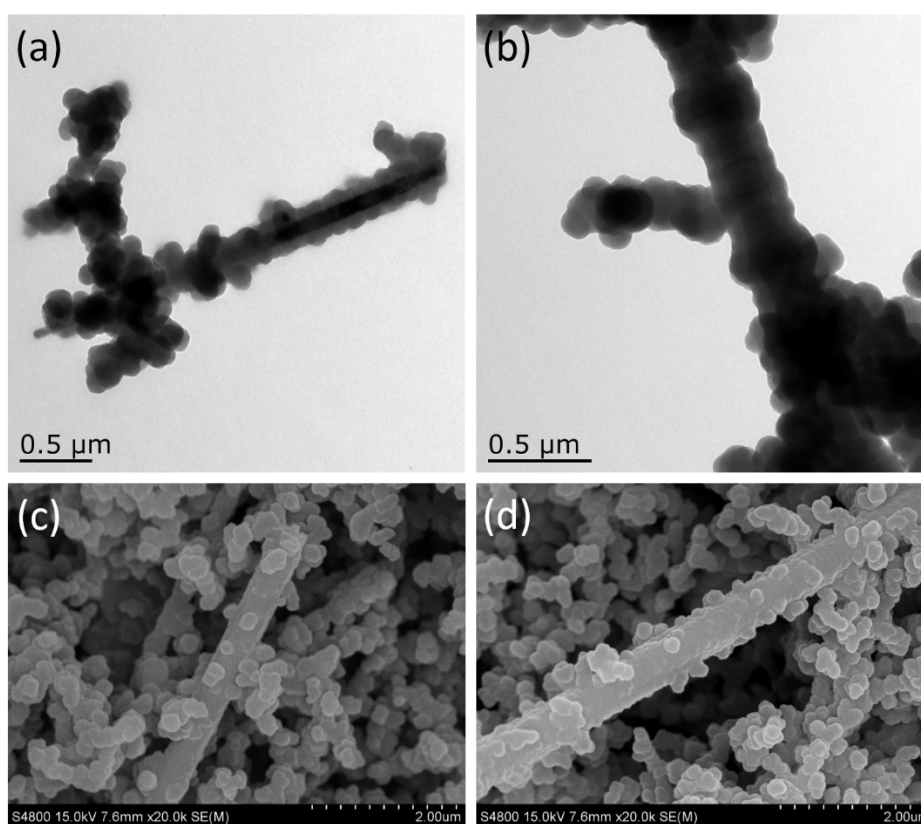

**Fig. S1** SEM and TEM images of sample 1 (a, c) and sample 3 (b, d).

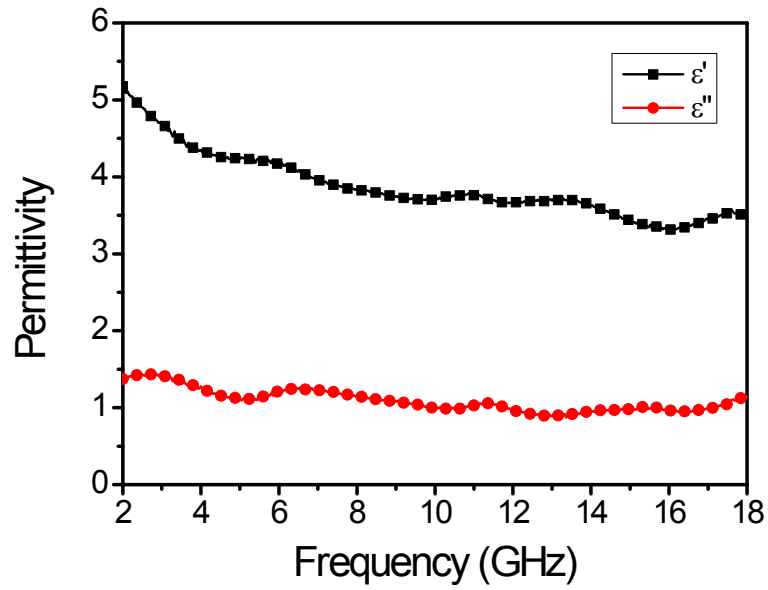

**Fig. S2** Permittivity of SiC nanowire (10 wt%) in wax matrix.

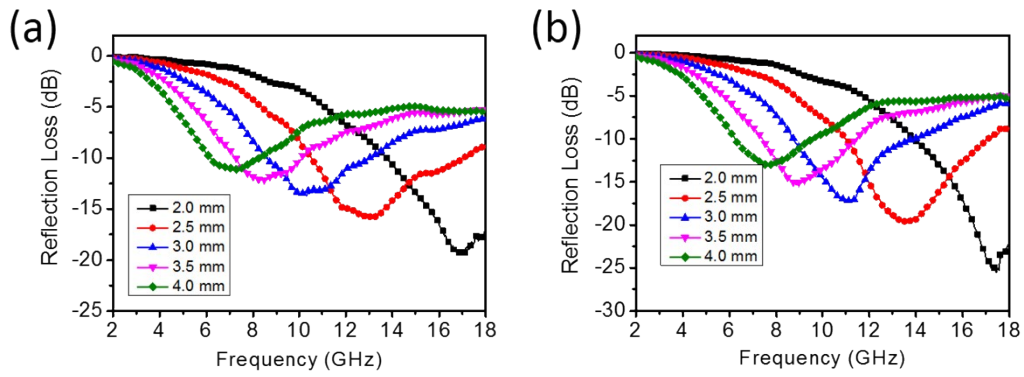

**Fig. S3** RL curves of sample 1 (a) and sample 3 (b) at thicknesses from 2.0 to 4.0 mm.

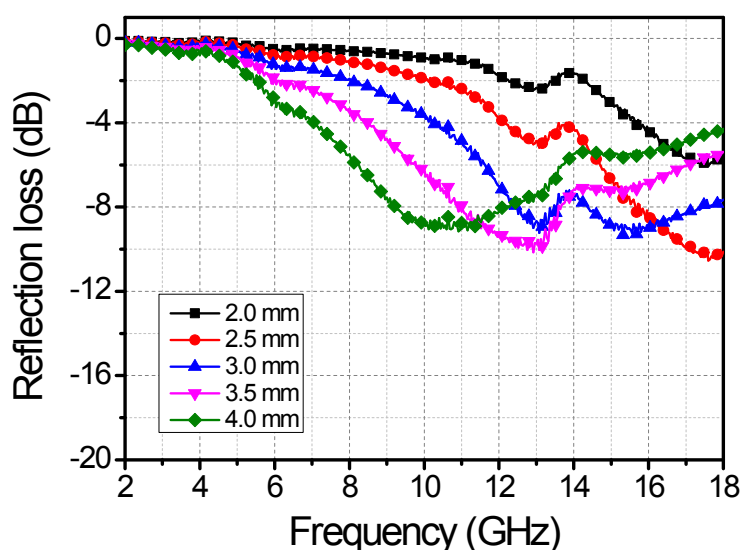

**Fig. S4** RL curves of 10 wt% SiC nanowire in wax from 2 to 4 mm.

## References

1. C. Liang, C. Liu, H. Wang, L. Wu, Z. Jiang, Y. Xu, B. Shen and Z. Wang, *J. Mater. Chem. A*, 2014, **2**, 16397.
2. H. Wang, L. Wu, J. Jiao, J. Zhou, Y. Xu, H. Zhang, Z. Jiang, B. Shen and Z. Wang, *J. Mater. Chem. A*, 2015, **3**, 6517.
3. Y. Dou, J. Li, X. Fang, H. Jin and M. Cao, *Appl. Phys. Lett.*, 2014, **104**, 052102.
4. G. Zheng, X. Yin, S. Liu, X. Liu, J. Deng and Q. Li, *J. Eur. Ceram. Soc.*, 2013, **33**, 2173.
5. A. Xie, F. Wu, M. Sun, X. Dai, Z. Xu, Y. Qiu, Y. Wang, M. Wang, *Appl. Phys. Lett.*, 2015, **106**, 222902.
6. F. Wu, A. Xie, M. Sun, Y. Wang, M. Wang, *J. Mater. Chem. A*, 2015, **3**, 14358.
7. J. Shen, K. Chen, L. Li, W. Wang, Y. Jin, *J. Alloy. Comp.*, 2014, **615**,

488-495.

8. A. Xie, W. Jiang, F. Wu, X. Dai, M. Sun, Y. Wang and M. Wang, *J. Appl. Phys.*, 2015, **118**, 204105.
